# Supplementary material
Source: PubMed Central journal article supplement (PMC2837937)
Supplement: NIHMS180934-supplement-Supplement_Figures.pdf [file NIHMS180934-supplement-Supplement_Figures.pdf]

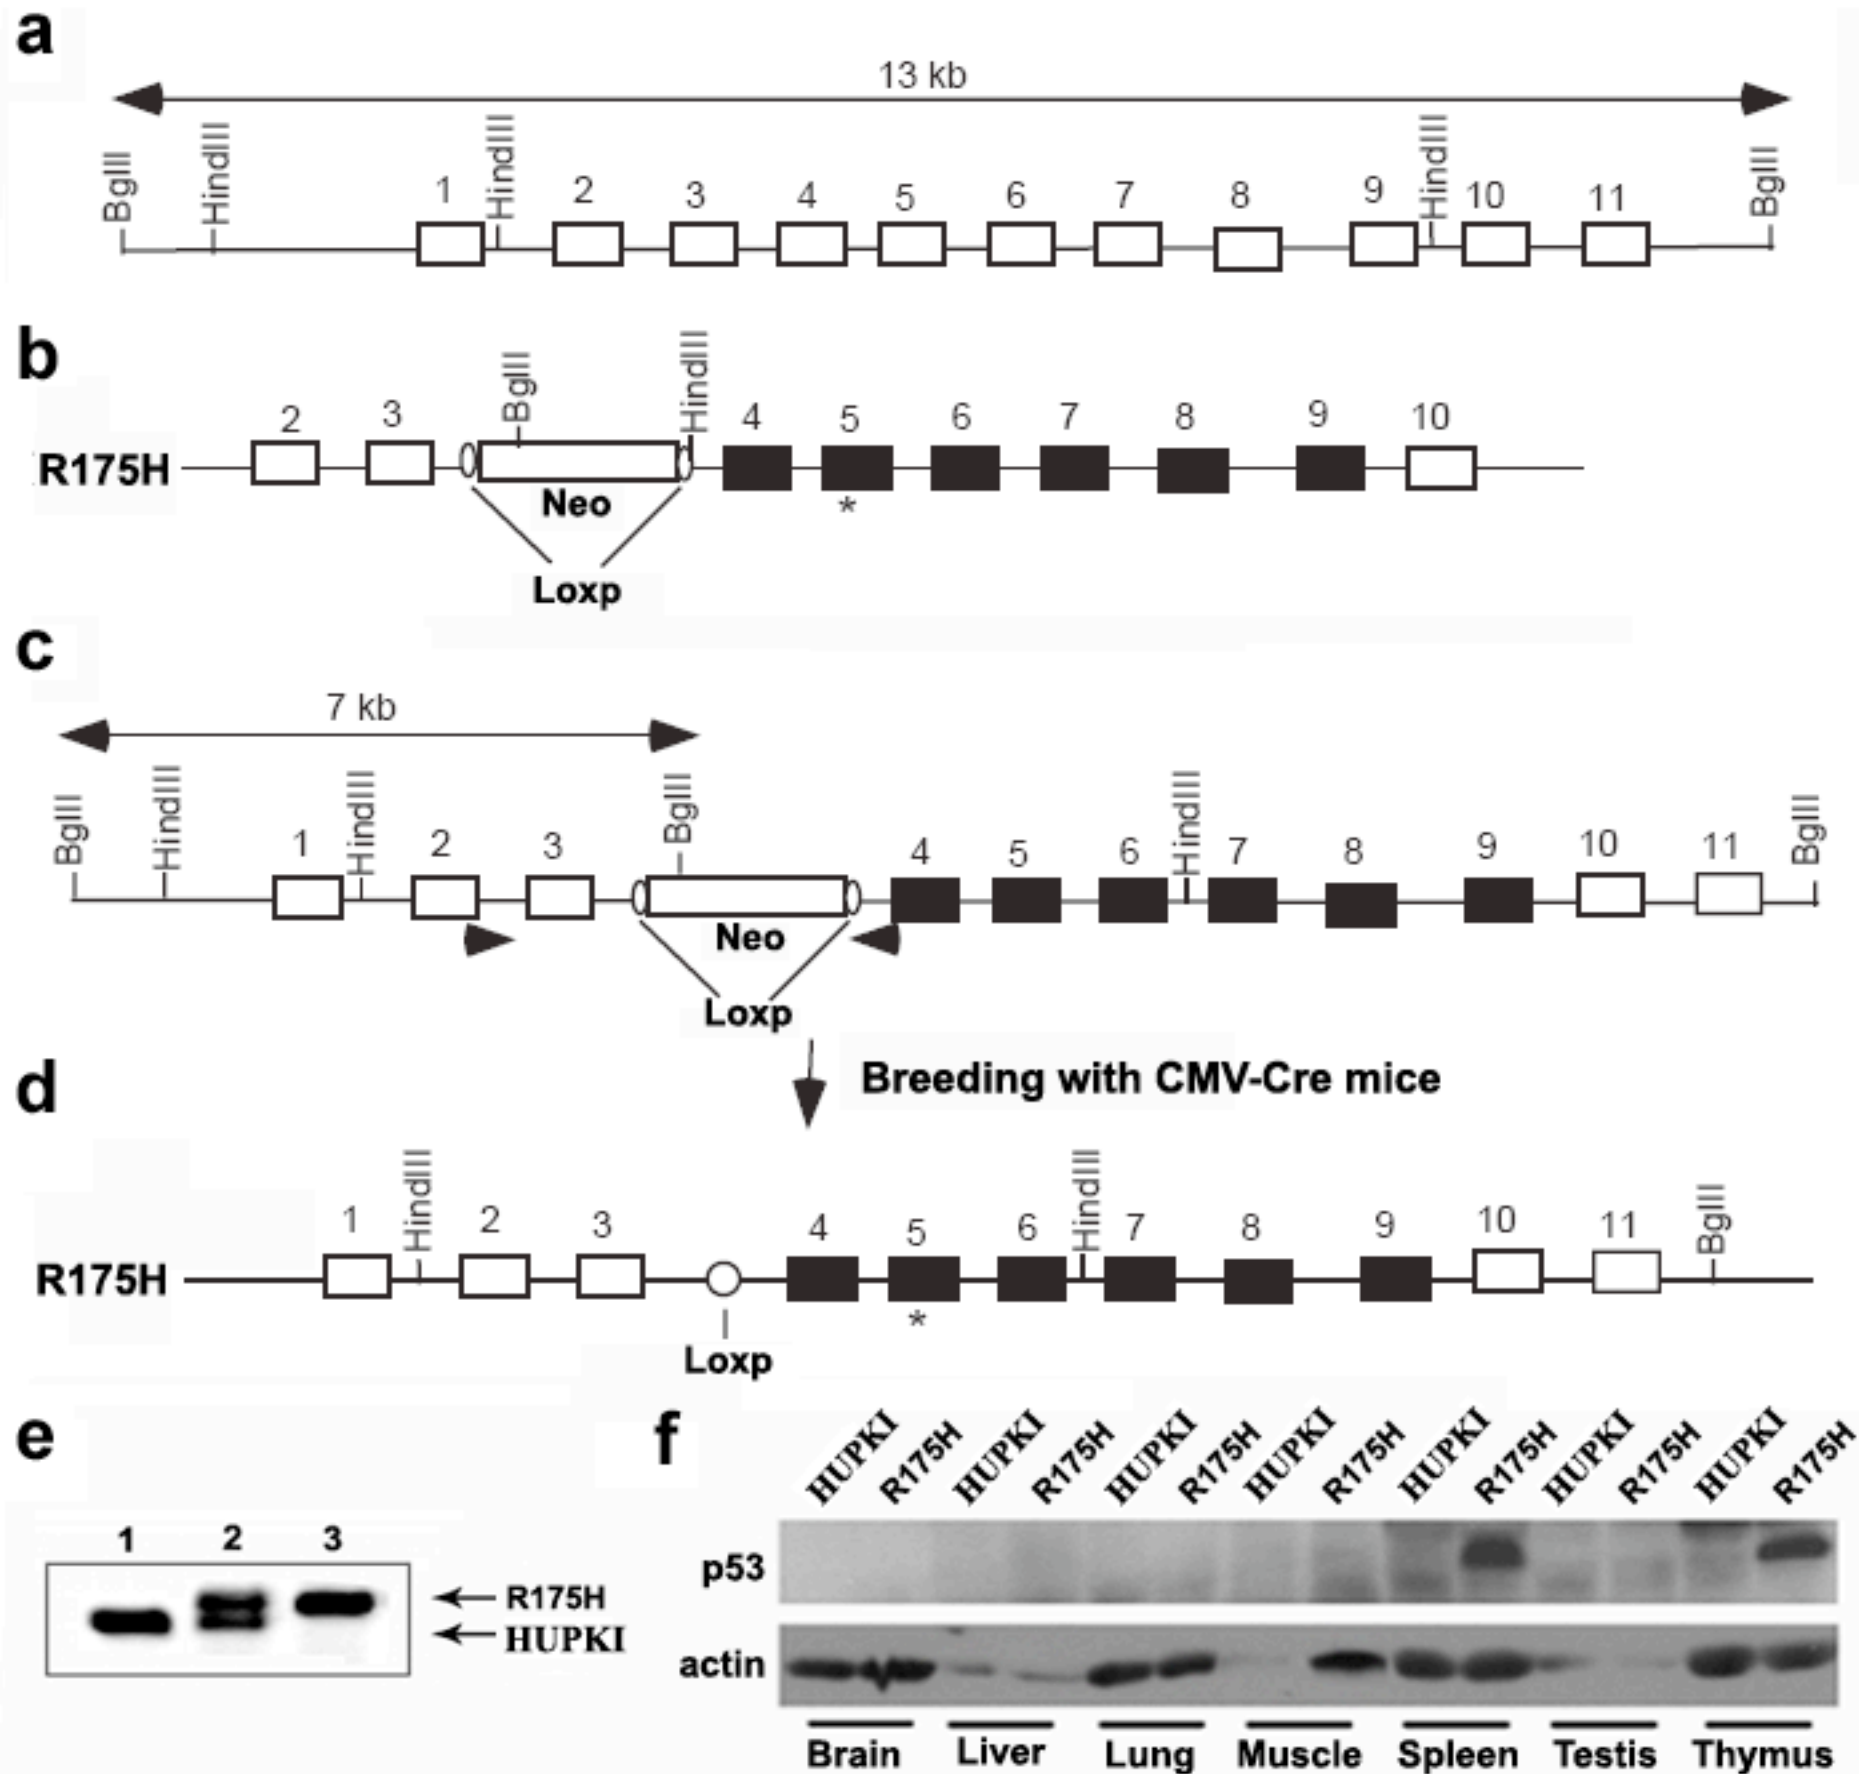

**Supplementary Figure 1. Generation of p53 R175H mutant and p53hki knock-in mice. (a)** The endogenous mouse p53 locus. **(b)** The targeting construct. Mouse p53 genomic DNA from Exons 4-9 were replaced by corresponding human genomic DNA. The PGK-NeoR cassette flanked by two LoxP sites was inserted into intron 3, and the length of LoxP sites for HUPKI and R175H allele was different to allow the genotyping. R175H mutation was introduced into exon 5 (asterisk) of the human p53 genomic DNA fragment by site-directed mutagenesis. **(c)** The targeted p53 locus following homologous recombination between the endogenous mouse p53 allele and the targeting vector. **(d)** HUPKI and R175H mutant alleles following LoxP/Cre-mediated deletion of the PGK-NeoR gene. **(e)** PCR analysis of the genomic DNA isolated from the tails of WT (lane 1), HUPKI/R175H (lane 2) and R175H (lane 3) mice. **(f)** Expression of p53 in various tissues of the 3 weeks old HUPKI and R175H mutant mice. P53 and actin are indicated.
